# Supplementary material for: Proteomic maps of breast cancer subtypes
Source: Nat Commun. 2016 Jan 4;7:10259. doi: 10.1038/ncomms10259 (PMC4725767; doi:10.1038/ncomms10259)
Supplement: Supplementary Figures and Table — Supplementary Figures 1-6 and Supplementary Table 1 [file ncomms10259-s1.pdf]

**Supplementary Figure 1**

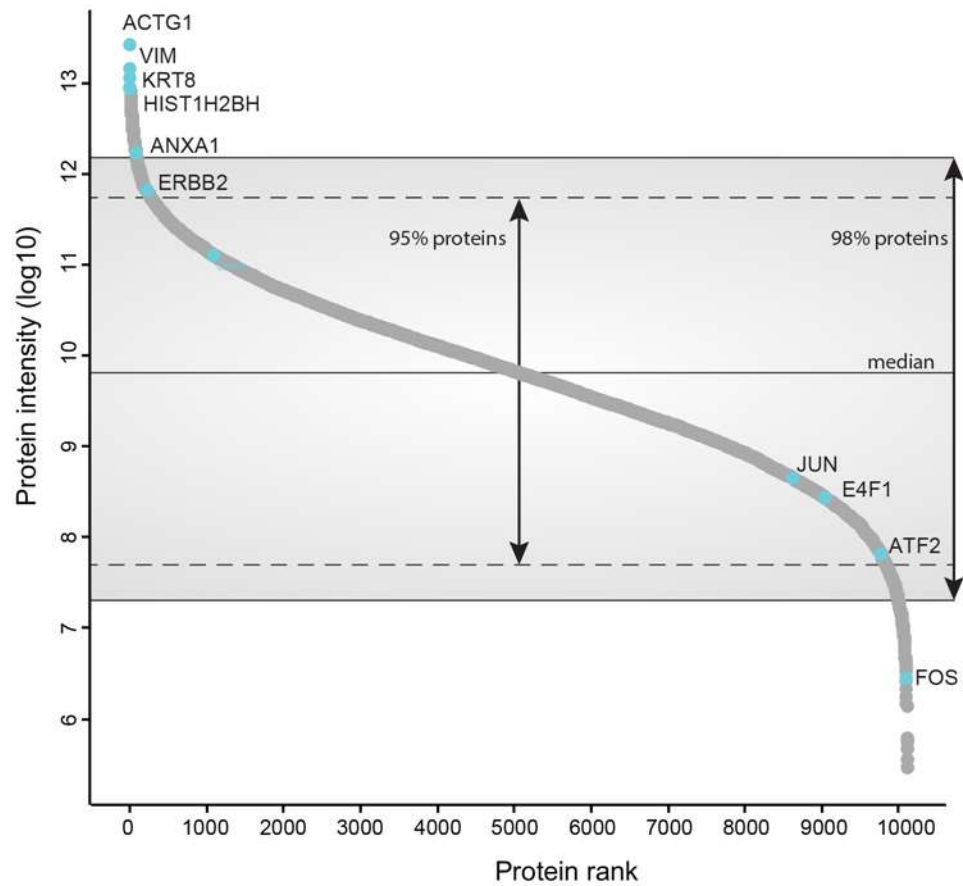

**Supplementary Figure 1. Abundance curve of proteins.** Ranking of protein abundances shows that the overall distribution of protein abundances spans eight orders of magnitude. Nevertheless, the vast majority of the proteins (95%) are within a range of four orders of magnitude.

## Supplementary Figure 2

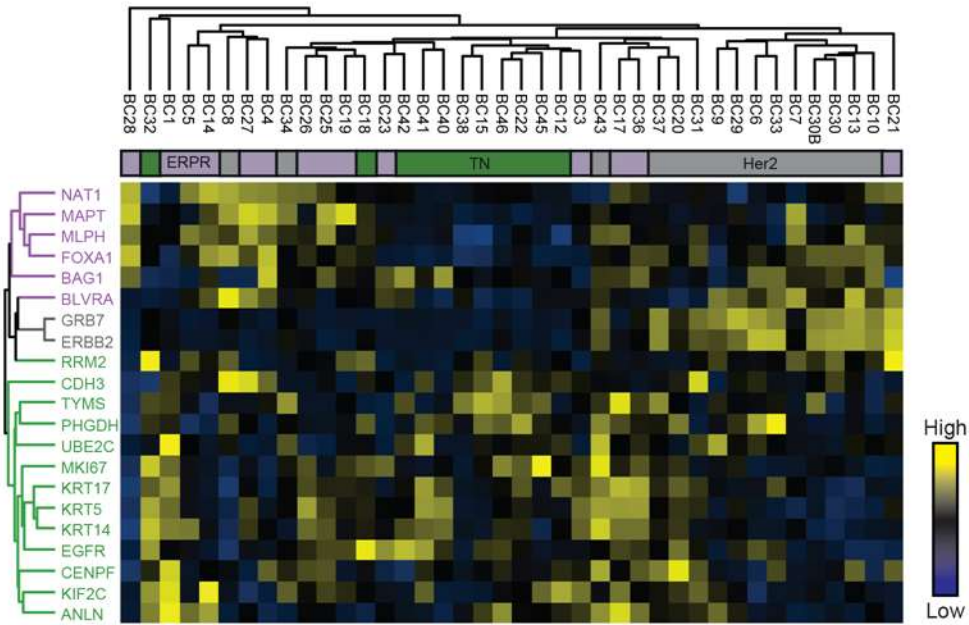

**Supplementary Figure 2. Protein expression of the PAM50 genes.** Hierarchical clustering of the protein levels (normalized ratio towards the super-SILAC mix). PAM50 genes enable partial segregation of classical subtypes on the protein level. Color code for gene names: purple- ER, gray- Her2, green-TN.

Supplementary Figure 3

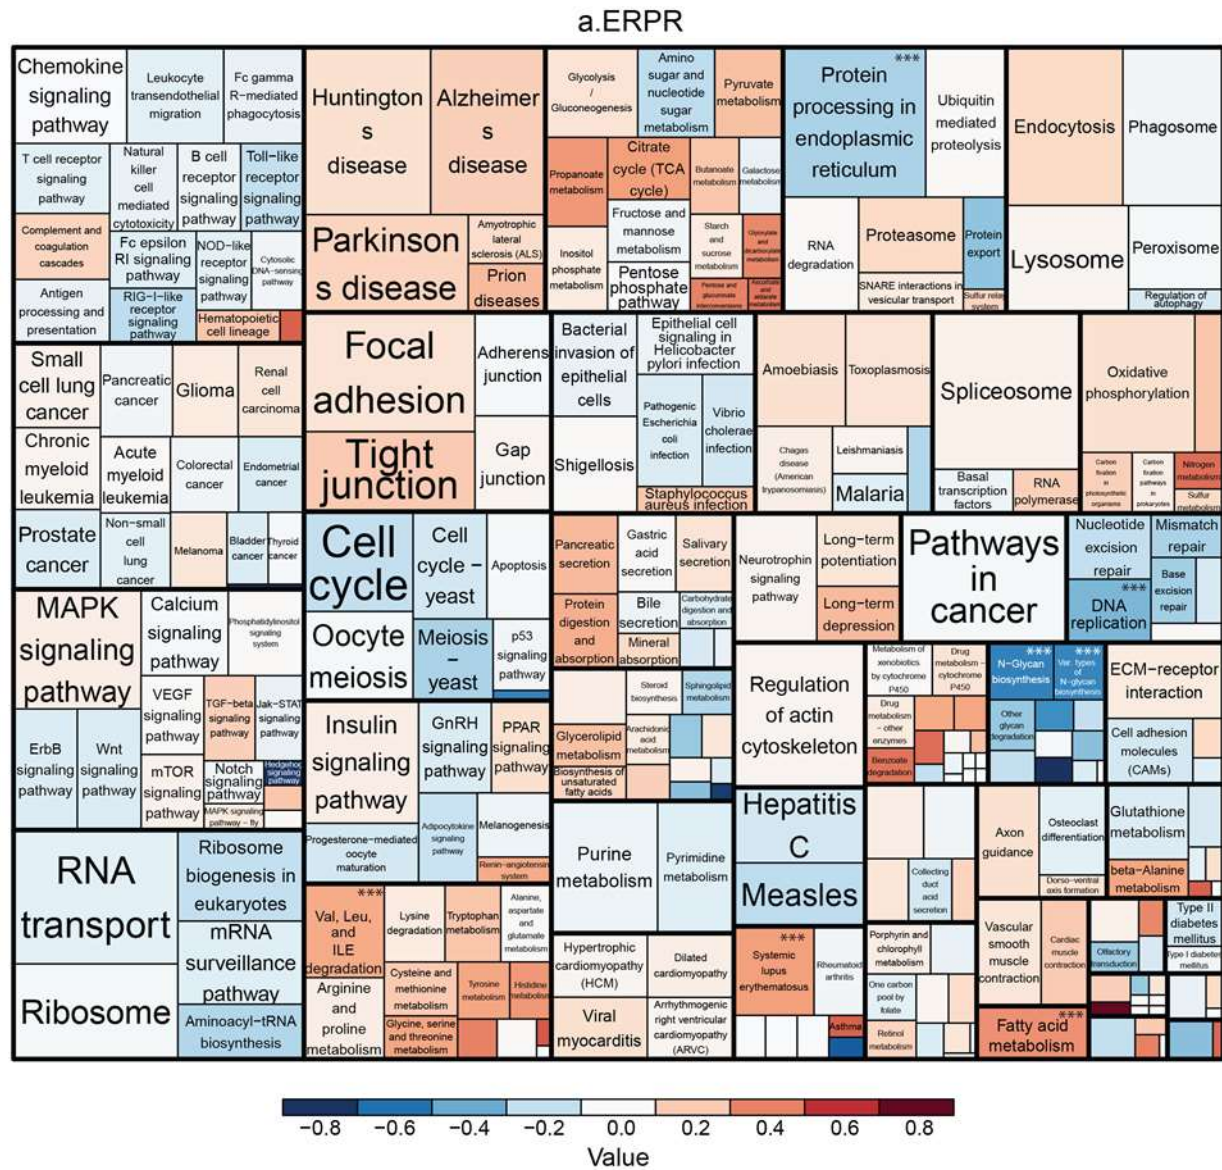

## b.Her2

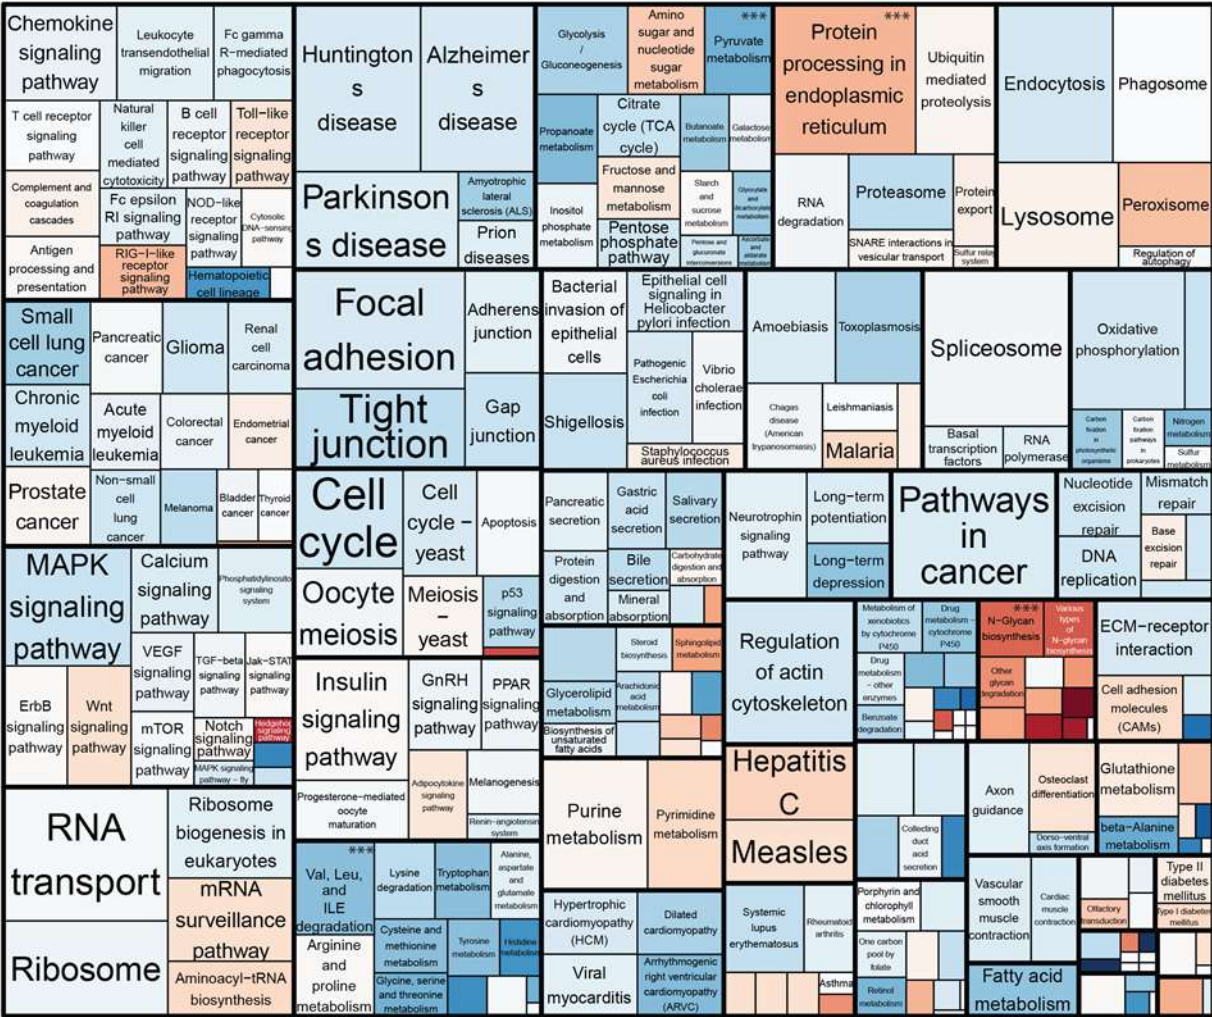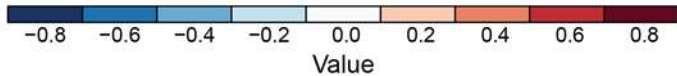

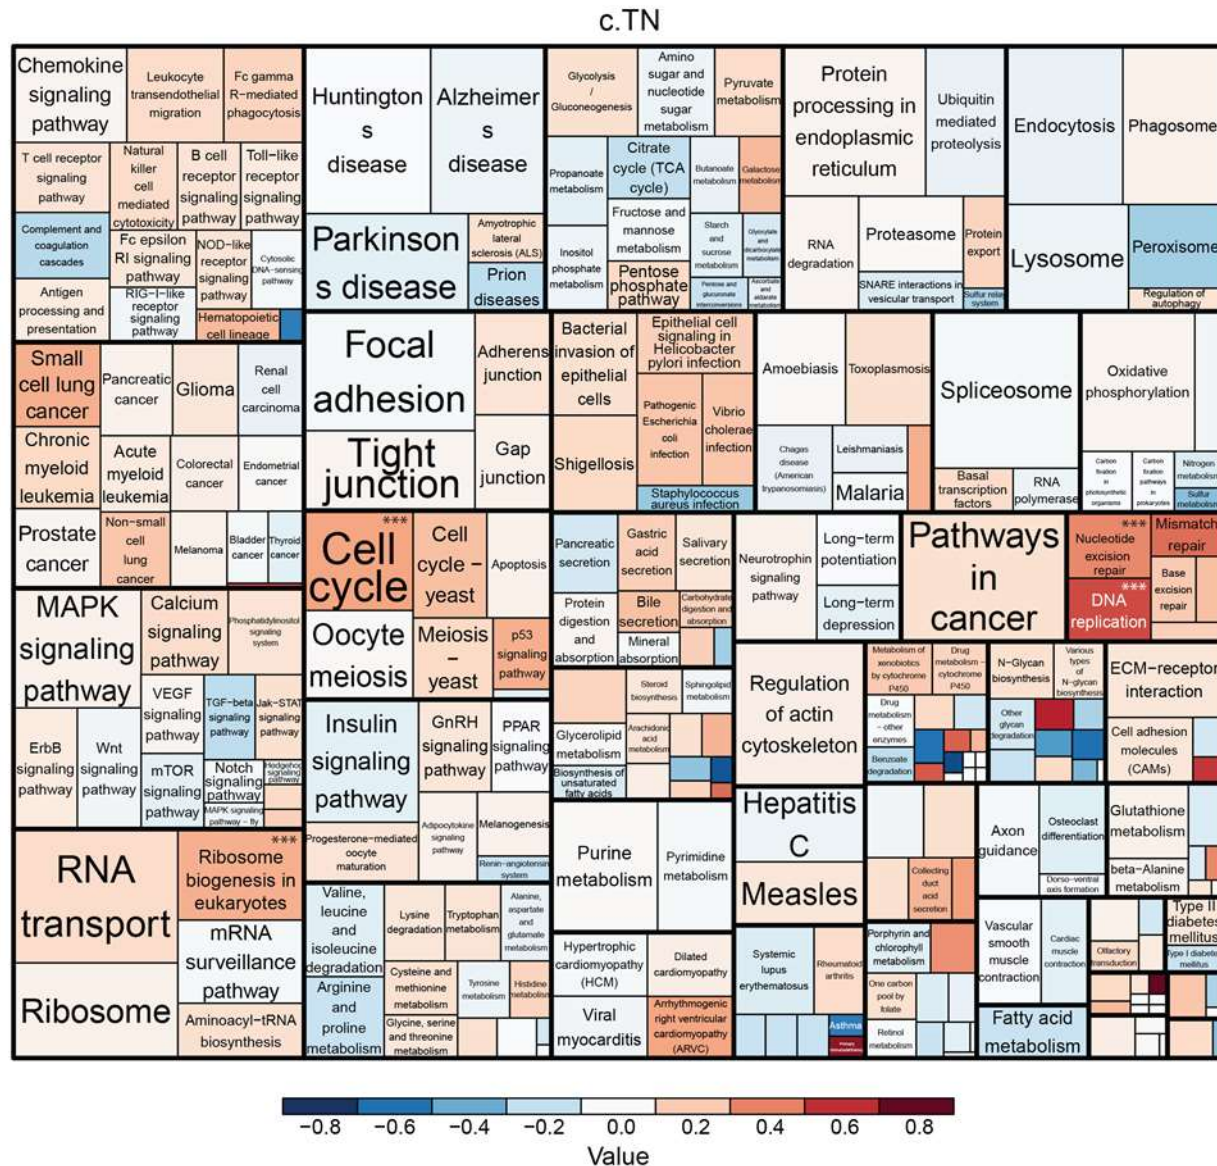

**Supplementary Figure 3. Tree-maps of KEGG pathways.** Enrichment of breast cancer subtype-specific KEGG pathways is shown for ERPR (a), Her2 (b), and TN (c) breast cancer subtypes. Each Tree-map includes all KEGG pathways. The size of the boxes corresponds to the number of proteins in that category and the color - to the enrichment score  $S$ , computed with the 1D enrichment test. Categories in red are characterized by higher average expression in the corresponding subtype, and in dark blue – by lower average expression. The categories that are significantly enriched at FDR 5% are indicated by \*\*\*.

### Supplementary Figure 4

### a. Glycan biosynthesis and metabolism

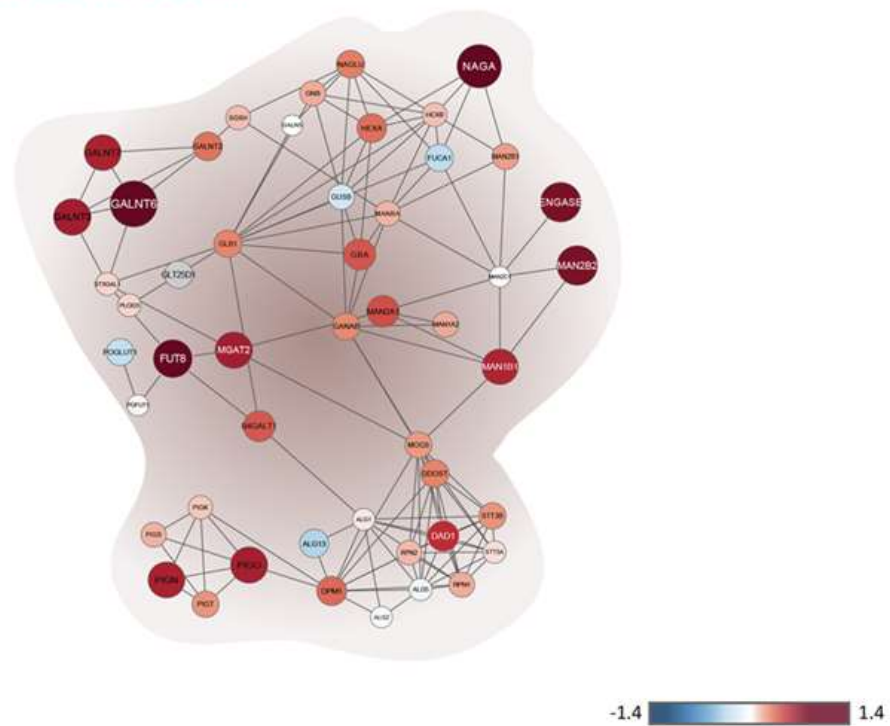

**c. Amino acid metabolism**

-1.4

d. Translation

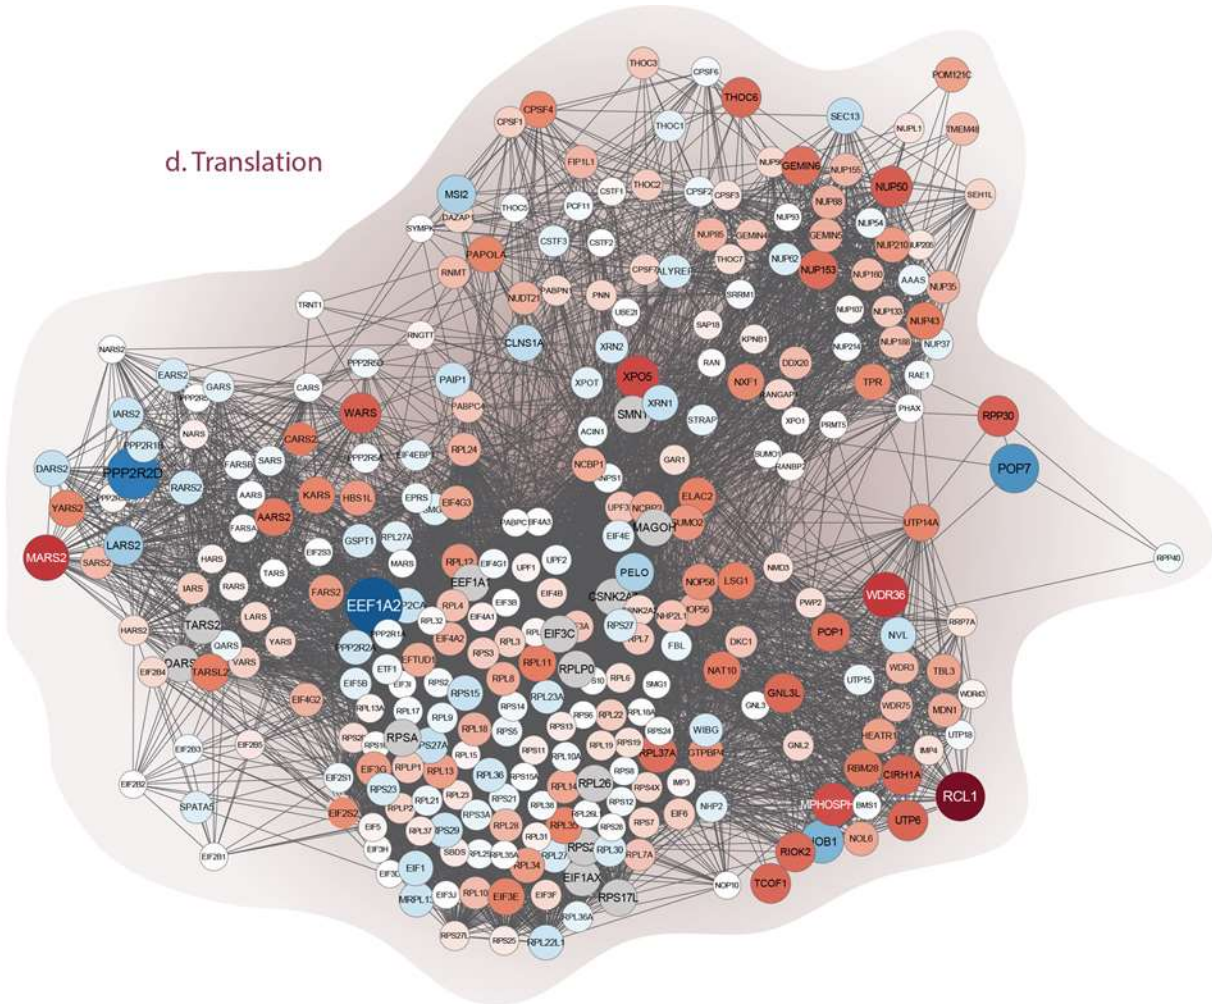

e. Replication

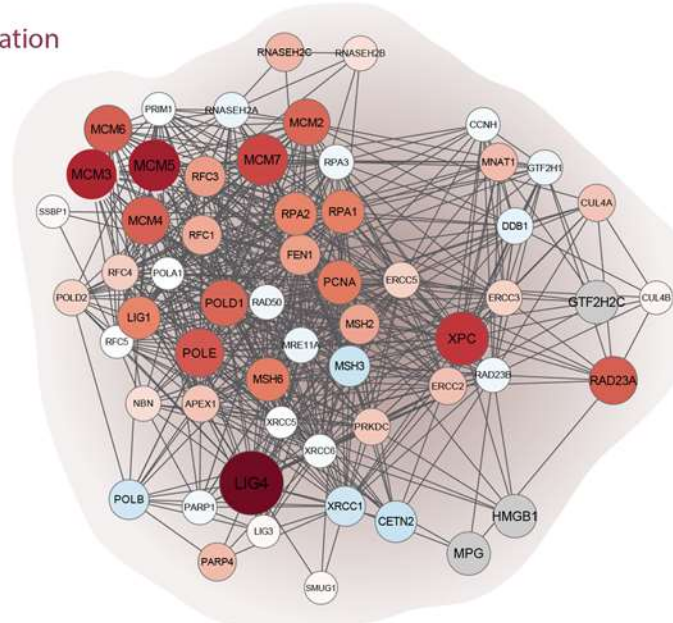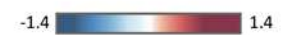

## f. Cell growth and death

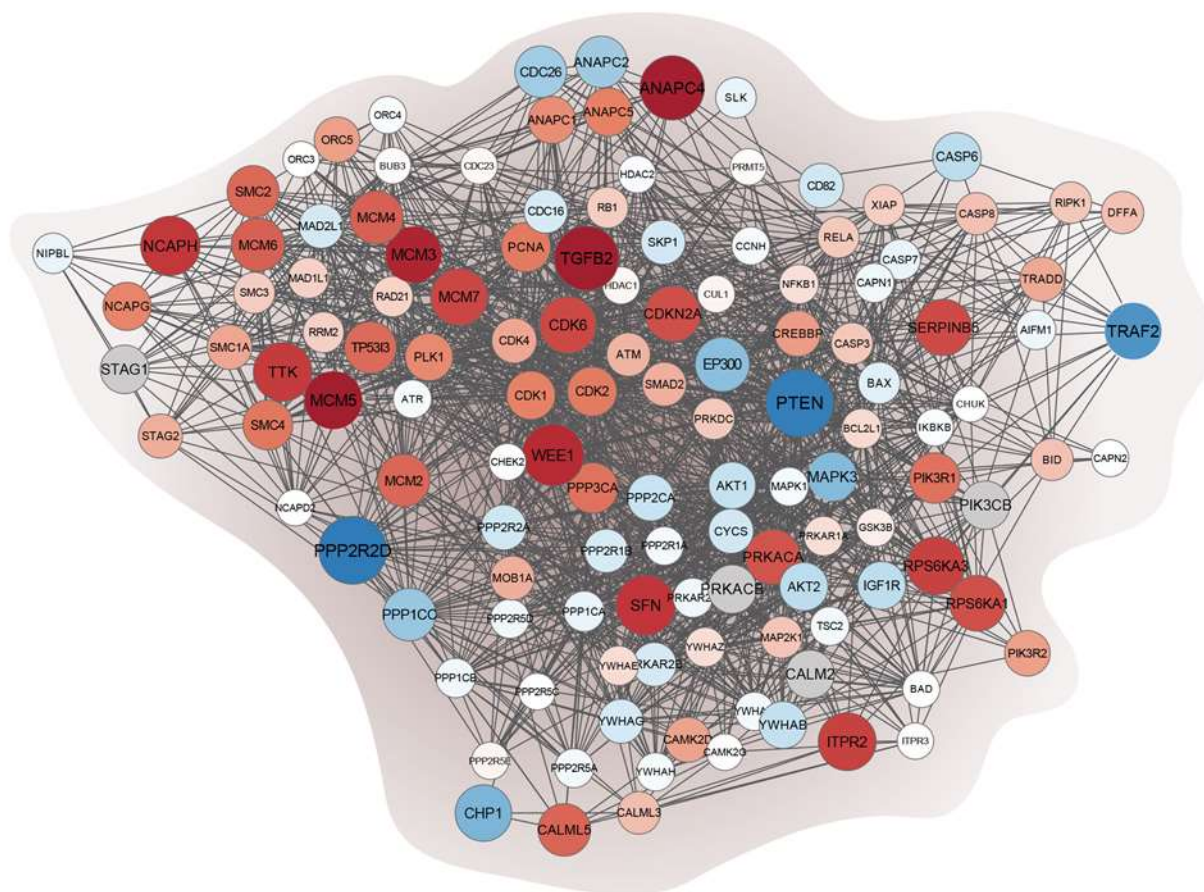

**Supplementary Figure 4. Protein-protein interaction networks of enriched KEGG categories with differential subtype expression.** The networks were constructed in String ([www.string-db.org](http://www.string-db.org)). The color of the nodes corresponds to the protein expression fold change between a particular subtype and the two other subtypes; red indicates higher expression and blue – lower expression in the selected subtype. The size of the nodes corresponds to the absolute protein expression fold change. **a.** Glycan biosynthesis and metabolism has higher average expression in the Her2 subtype relative to the ERPR and TN; Cellular community **(b)** and Amino acid metabolism **(c)** KEGG categories with lower average expression in the Her2 subtype; Translation **(d)**, Replication **(e)** and Cell growth and Death **(f)** KEGG categories with higher average expression in the TN subtype relative to ERPR and Her2.

## Supplementary Figure 5

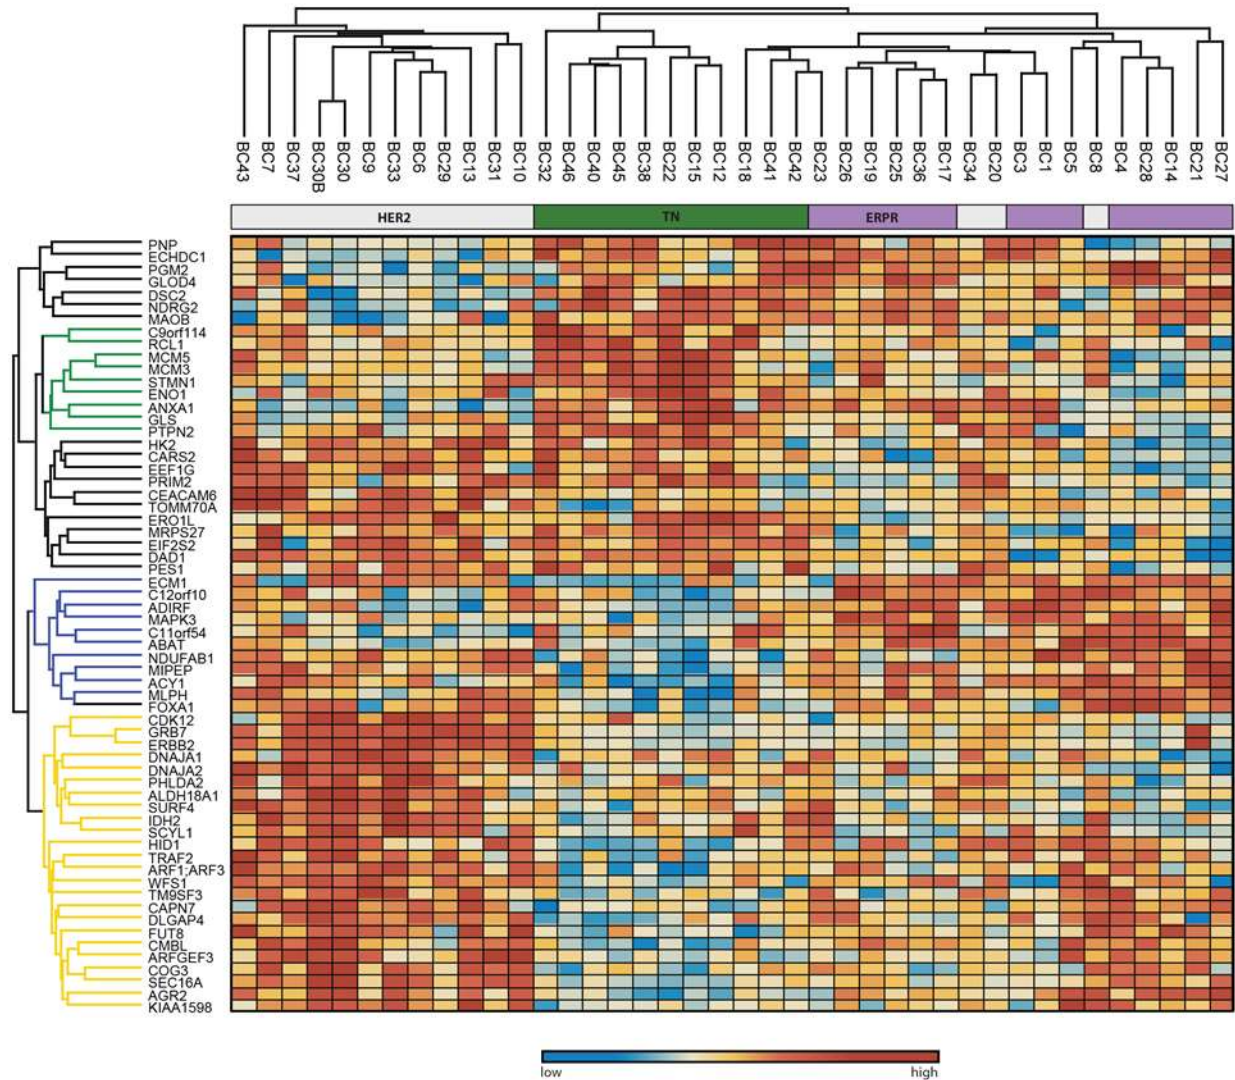

**Supplementary Figure 5. Hierarchical clustering of differentially-expressed proteins.** Differentially expressed proteins between the three cancer subtypes were identified with ANOVA analysis and permutation-based FDR of 5%. The proteins are colored according to their expression level. Subtype-specific clusters can be distinguished marked in (yellow: Her2, green: TN and blue: ERPR) on the row cluster tree. Cross-subtype clusters are shown in (black).

Supplementary Figure 6

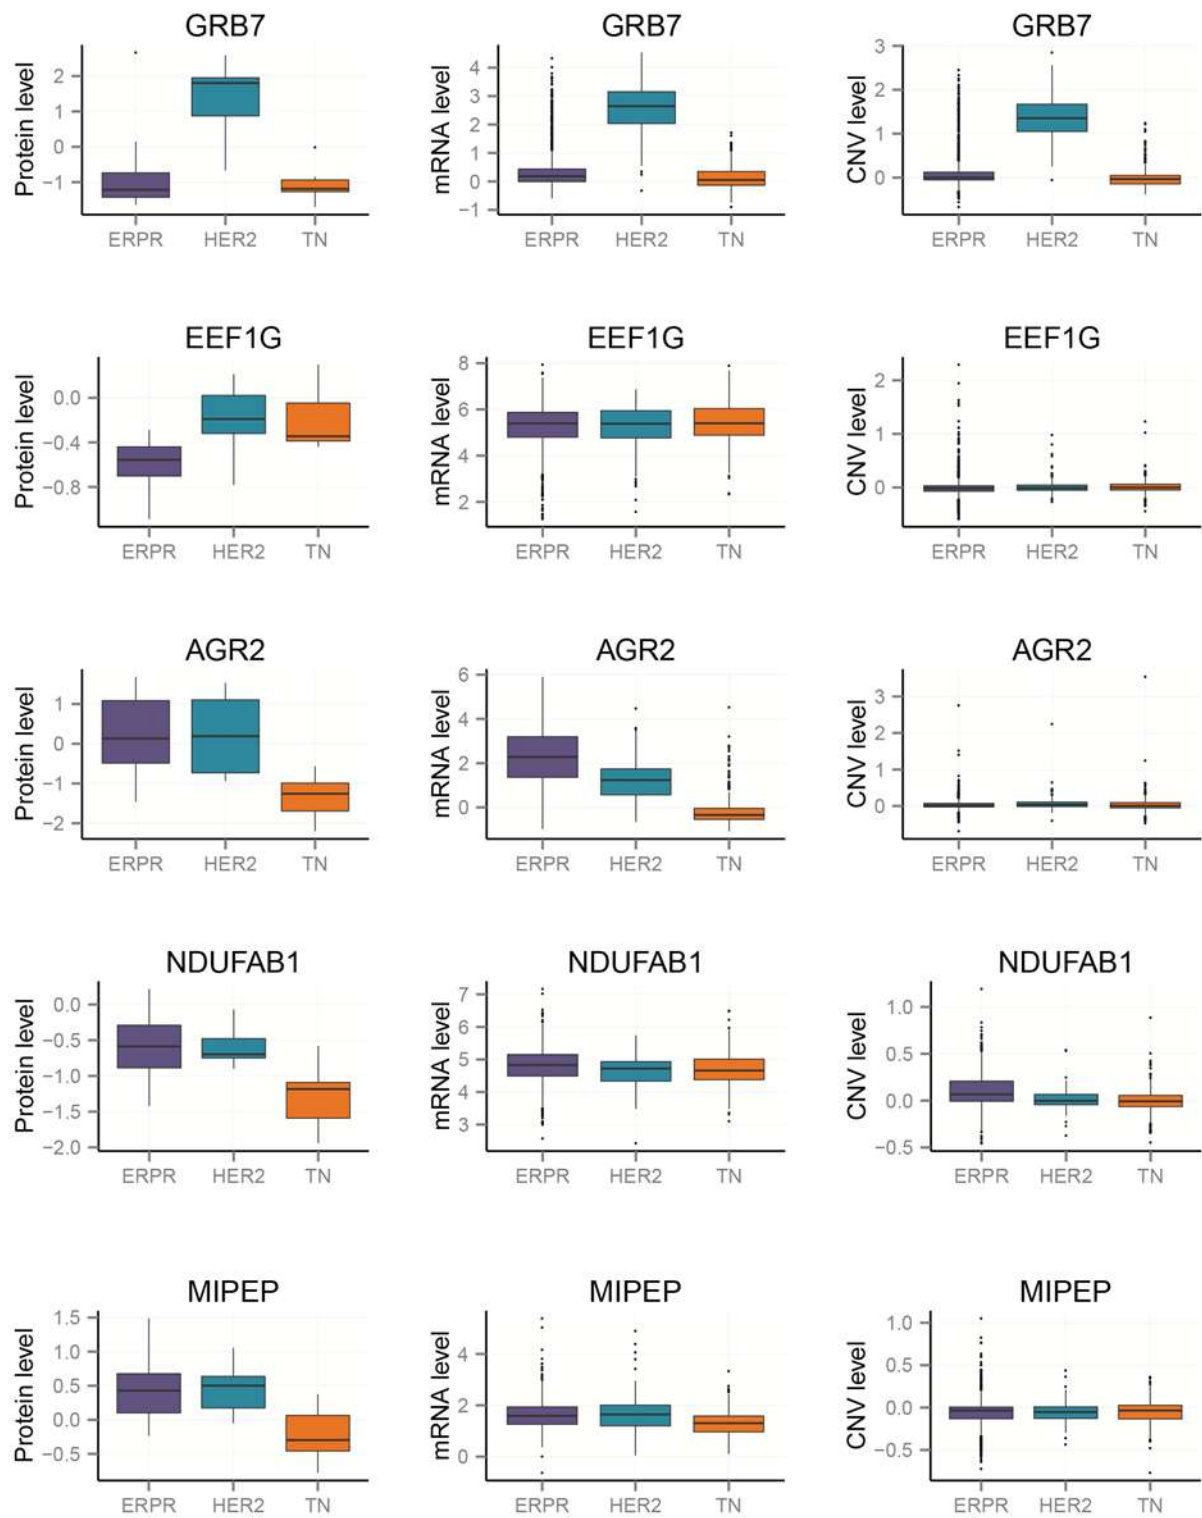

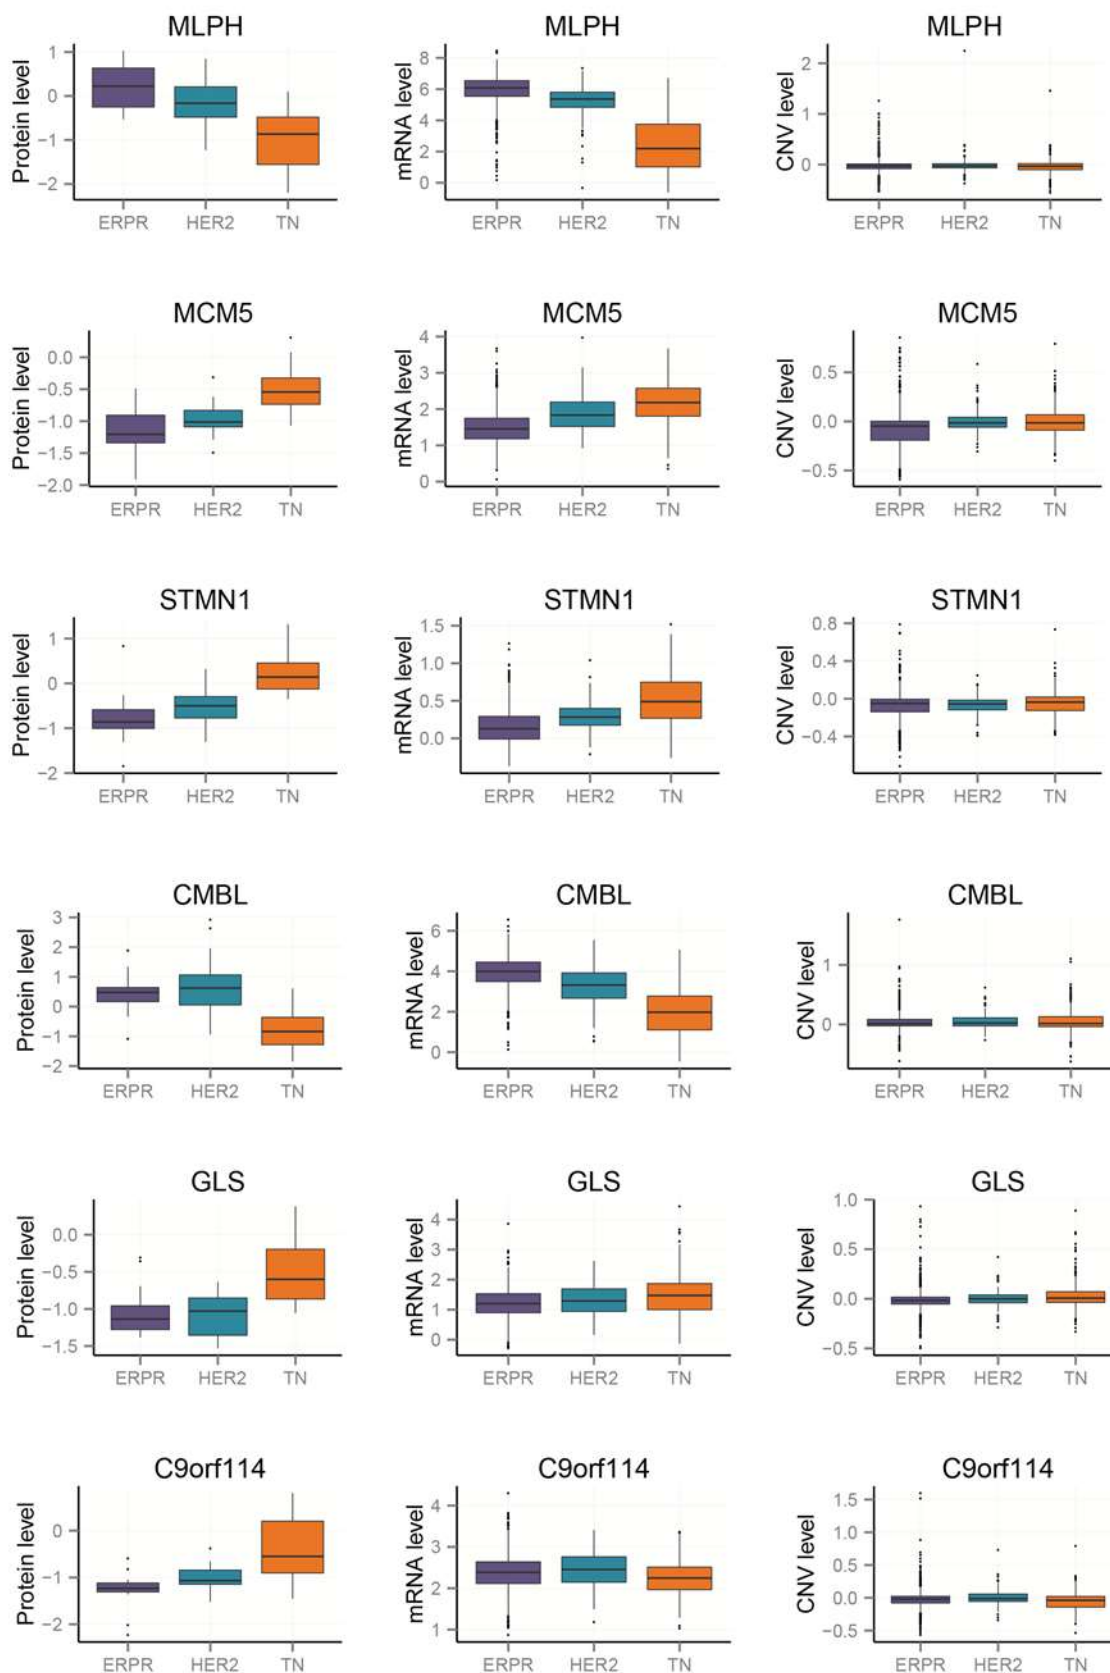

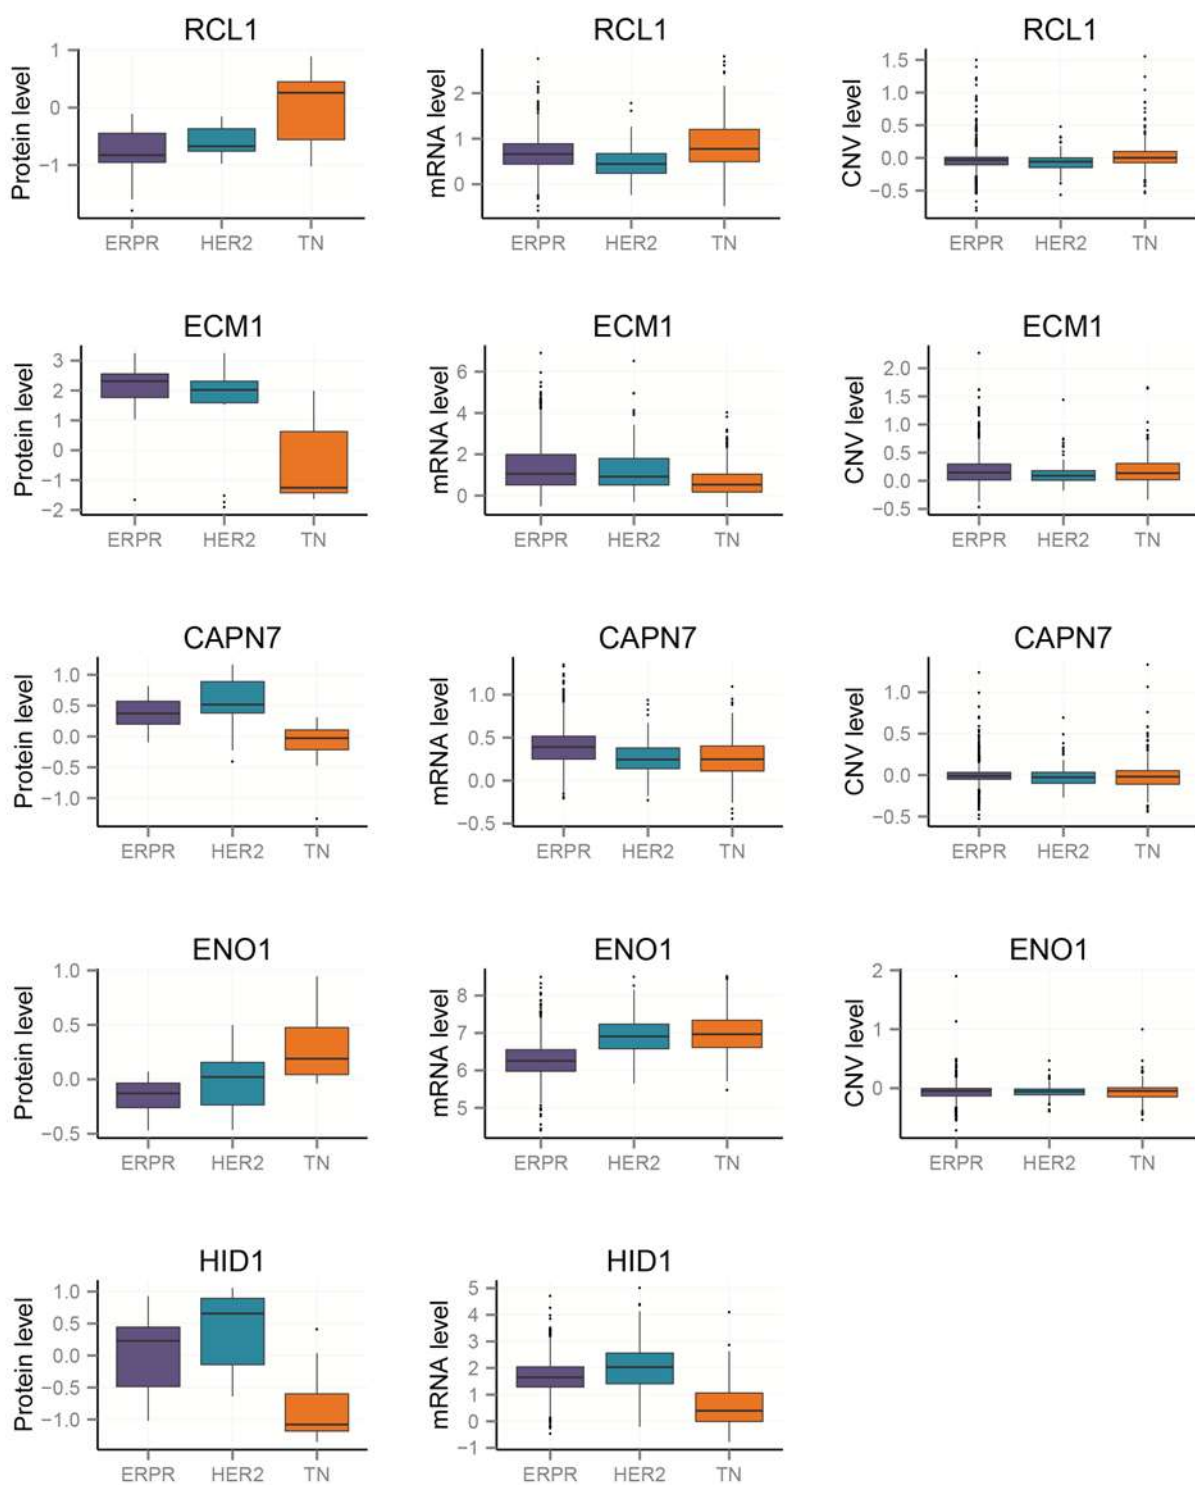

**Supplementary Figure 6: Comparison of protein expression, mRNA expression and CNV distributions in each subtype for all signature proteins (excluding those shown in Figure 6).**

**Supplementary Table 1**

| Sample # | Clinical classification | TNM stage | Grade | Type   |
|----------|-------------------------|-----------|-------|--------|
| 1        | ERPR                    | T1bN0M0   | 1     | IDC    |
| 3        | ERPR                    | T2N1M0    | 3     | IDC    |
| 4        | ERPR                    | T1cN0M0   | 2     | IDC    |
| 5        | ERPR                    | T1aN0M0   | 2     | IDC    |
| 6        | HER2                    | T2N1M0    | 3     | IDC    |
| 7        | HER2                    | T2N0M0    | 3     | IDC    |
| 8        | HER2                    | T1bN0M0   | 3     | IDC    |
| 9        | HER2                    | T2N0M0    | 2     | IDC    |
| 10       | HER2                    | T2N1M0    | 3     | IDC    |
| 12       | TN                      | T2N0M0    | 3     | IDC    |
| 13       | HER2                    | n.d       | 3     | IDC    |
| 14       | ERPR                    | n.d       | 1     | IDC-Tu |
| 15       | TN                      | T2N0M0    | 3     | IDC    |
| 17       | ERPR                    | T2N1M0    | 3     | IDC    |
| 18       | TN                      | T2N0M0    | 3     | IDC    |
| 19       | ERPR                    | T2N1M0    | 3     | IDC    |
| 20       | HER2                    | T2N1M0    | 2     | IDC    |
| 21       | ERPR, Her2              | T1cN1M0   | 3     | IDC    |
| 22       | TN                      | T2N0M0    | 3     | IDC    |
| 23       | ERPR                    | T1cN1M0   | 2     | Lo     |
| 25       | ERPR                    | T1cN1M0   | 2     | IDC    |
| 26       | ERPR                    | T2N1M0    | 2     | Lo     |
| 27       | ERPR                    | T2N0M0    | 3     | IDC    |
| 28       | ERPR                    | T1cN1M0   | 2     | Lo     |
| 29       | HER2                    | T2N1M0    | 2     | IDC    |
| 30       | HER2                    | T2N0M0    | 3     | IDC    |
| 30B      | HER2                    | T4N0M0    | 3     | IDC    |
| 31       | HER2                    | T2N2M0    | 3     | IDC    |
| 32       | TN                      | T2N1M0    | 3     | IDC    |
| 33       | HER2                    | T2N1M0    | 3     | IDC    |
| 34       | HER2                    | T2N1M0    | 3     | IDC    |
| 36       | ERPR, Her2              | T2N0M0    | 3     | IDC    |
| 37       | HER2                    | T1cN0M0   | 3     | IDC    |
| 38       | TN                      | T1cN0M0   | 3     | IDC    |
| 40       | TN                      | T2N1M0    | 3     | IDC    |
| 41       | TN                      | T2N0M0    | 3     | IDC    |
| 42       | TN                      | T1cN0M0   | 3     | IDC    |
| 43       | HER2                    | T2N3M0    | 3     | IDC    |
| 45       | TN                      | T1cN0M0   | 3     | IDC    |
| 46       | TN                      | T2N0M0    | 3     | IDC    |

**Supplementary Table 1. Description of clinical samples.** Information includes the tumor type, clinical subtype, tumor grade and stage for each tumor.
